## Correction: Loss of Olfactory Receptor Genes Coincides with the Acquisition of Full Trichromatic Vision in Primates

Yoav Gilad, Victor Wiebe, Molly Przeworski, Doron Lancet, Svante Pääbo

doi:10.1371/journal.pbio.0020005

In *PLoS Biology*, volume 2, issue 1:

The Max Planck Society has requested that the following two statements be published:

### Statement 1: Erratum

Y. Gilad, M. Przeworski, and D. Lancet

Upon reanalysis of these data, we found a number of mistakes and realized that salient details were missing from the Materials and Methods section. In particular, once we corrected mistakes in the annotation, we found that the total number of distinct genes that were sequenced from each species actually ranged from 89 to 100. In the analysis, we excluded 7E sequences in apes that differed by more than 25 base pairs from the expected size. Moreover, while the vast majority (>97%) of sequences with more than 98% identity were collapsed, multiple sequences were treated as distinct genes when they clearly did not represent random taq errors. The exact sequences used in the analysis are available from <http://rd.plos.org/pbio.0050148>. These mistakes do not change the qualitative conclusions, but some of the numbers have changed: The corrected proportion of OR pseudogenes in non-human apes is  $36 \pm 2.9\%$ , in OWM it is  $32 \pm 4.3\%$ , and in NWM it is  $18.0 \pm 1.4\%$ . The proportion of pseudogenes in the howler monkey remains 31%.

### Statement 2

V. Wiebe and S. Pääbo retract their names from the publication since they are of the opinion that the primary data do not support the conclusions presented.

This correction note may be found online at doi:10.1371/journal.pbio.0050148.

Published 12 June 2007.

Citation: (2007) Correction: Loss of Olfactory Receptor Genes Coincides with the Acquisition of Full Trichromatic Vision in Primates. *PLoS Biol* 5(6): e148. doi:10.1371/journal.pbio.0050148

## Correction: Structural and Chemical Profiling of the Human Cytosolic Sulfotransferases

Abdellah Allali-Hassani, Wang Pan, Ludmila Dombrowski, Rafi Najmanovich, Wolfram Tempel, Aiping Dong, Peter Loppnau, Fernando Martin, Janet Thornton, Aled Edwards, Alexey Bochkarev, Alexander Plotnikov, Masoud Vedadi, Cheryl Arrowsmith

doi:10.1371/journal.pbio.0050097

In *PLoS Biology*, volume 5, issue 5:

The ninth author's name was incorrectly given as Janet Thonton; it should be Janet Thornton.

This correction note may be found online at doi:10.1371/journal.pbio.0050165.

Published June 12, 2007.

Citation: (2007) Correction: Structural and Chemical Profiling of the Human Cytosolic Sulfotransferases. *PLoS Biol* 5(6): e165. doi:10.1371/journal.pbio.0050165
